# Supplementary material for: Coherent vibrational dynamics of Au144(SR)60 nanoclusters
Source: Royal Society of Chemistry journal article supplement (doi:10.1039/d2sc02246j), 2022-01-01
Supplement: d2sc02246j1.pdf [file d2sc02246j1.pdf]

# *Electronic Supplementary Information*

## **Coherent Vibrational Dynamics of Au<sub>144</sub>(SR)<sub>60</sub> Nanoclusters**

Wei Zhang,<sup>a</sup> Jie Kong,<sup>a</sup> Yingwei Li,<sup>b</sup> Zhuoran Kuang,<sup>c</sup> He Wang,<sup>d</sup> Meng Zhou<sup>a,d,\*</sup>

<sup>a</sup>Department of Chemical Physics, University of Science and Technology of China, Hefei, Anhui 230026, China

<sup>b</sup>Department of Chemistry and Chemical Biology, Harvard University, 12 Oxford Street, Cambridge, Massachusetts 02138, United States

<sup>c</sup>School of Science, Beijing University of Posts and Telecommunications (BUPT), Beijing 100876, P. R. China

<sup>d</sup>Department of Physics, University of Miami, Coral Gables, Florida 33146, United States

\*To whom correspondence should be addressed. Email: [mzhou88@ustc.edu.cn](mailto:mzhou88@ustc.edu.cn)

## S1. Materials and Methods

### Synthesis and Chemicals

The synthesis of Au<sub>144</sub>PET<sub>60</sub> followed a previous method.<sup>1</sup> All chemicals used in this work were purchased from Sigma-Aldrich and used without further purification.

### Steady-State Optical Absorption and Cryogenic Optical Measurements

The steady-state absorption spectra were measured using an Agilent Cary 60 absorption spectrometer. The cryogenic optical measurements were performed in a cryostat (Janis Research Company). For the temperature dependent measurements, Au NCs were dispersed in polymethyl methacrylate (PMMA) thin films. First, 80 mg of PMMA was dissolved in 1 mL of toluene to form a colorless solution. Then, 20  $\mu$ L of toluene solution of Au<sub>144</sub>PET<sub>60</sub> NCs (ca. 2mg/mL) was added into 10  $\mu$ L of the PMMA solution. Finally, the mixture of Au<sub>144</sub>PET<sub>60</sub> NCs and PMMA matrix was drop-cast onto a clean quartz plate, and the solvent was evaporated slowly at room temperature. The steady-state absorption spectra of Au<sub>144</sub>PET<sub>60</sub> NCs dissolved in toluene and dispersed in PMMA were found to be identical.

### Mass Spectrometry

MALDI-MS was performed with a PerSeptive-Biosystems Voyager DE super-STR time-of-flight (TOF) mass spectrometer.

### Ultrafast Transient Absorption

The pump beam was generated in a collinear optical parametric amplifier (Light Conversion) pumped by the 800nm output of an amplified Ti:sapphire laser (Coherent Astrella, 5 kHz). The TA measurements were performed on a Helios Fire commercial spectrometer (Ultrafast System), which was described in a previous report in detail.<sup>2</sup> There is no photo degradation after the TA measurements checked by the steady-state absorption spectra.

## S2. Temperature-Dependent TA

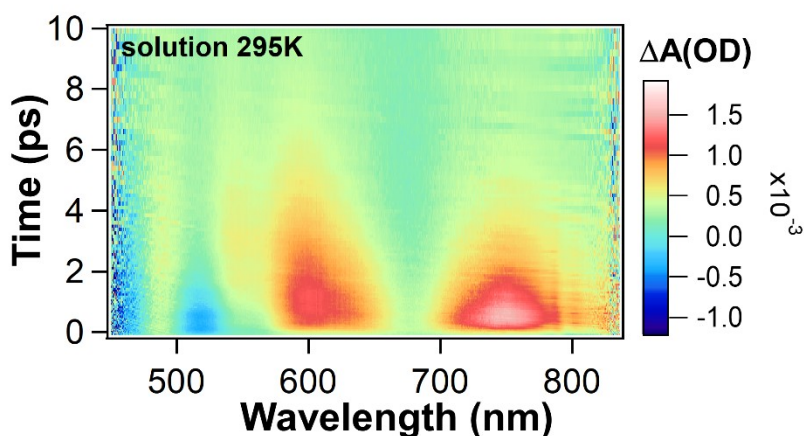

**Fig. S1** The TA spectral data map of Au<sub>144</sub>PET<sub>60</sub> solution (solvent is toluene) under excitation of 400 nm at 295 K.

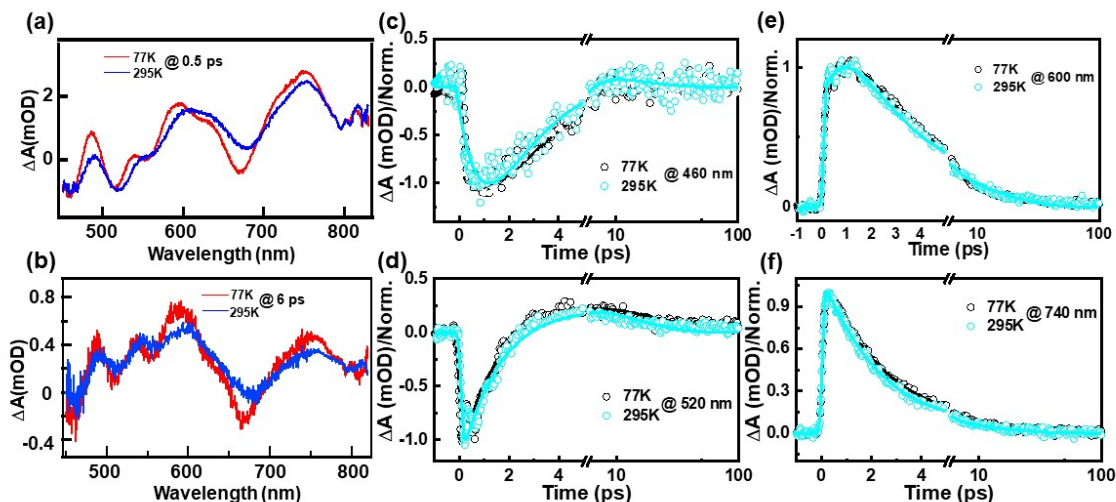

**Fig. S2** The temperature-dependent TA spectra of Au<sub>144</sub>PET<sub>60</sub> dispersed in PMMA thin film. The TA spectra displayed at time delay of (a) 0.5 ps and (b) 6 ps. (c)-(f) The kinetic traces of TA spectra obtained at different temperatures.

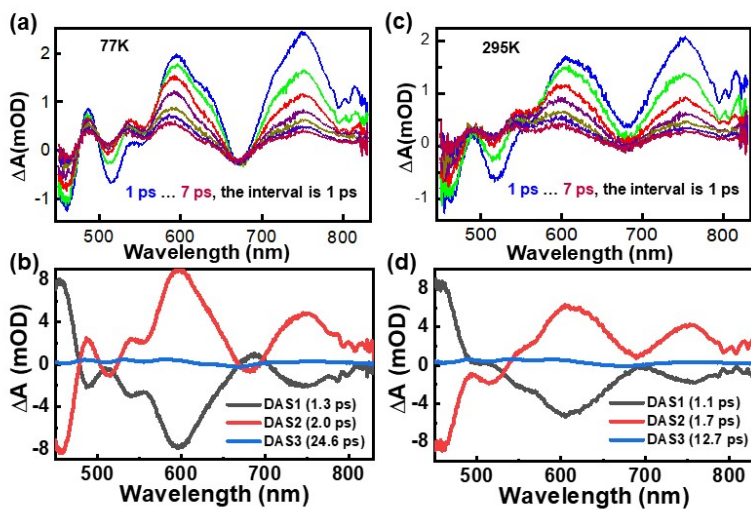

**Fig. S3** The TA spectra of Au<sub>144</sub>PET<sub>60</sub> dispersed in PMMA thin film and DAS results obtained at (a and b) 77 K, (c and d) 295 K. The data obtained at 77 K are shown as comparisons.

**Table S1.** The global analysis results obtained at different temperatures.

|      | Components | Time Constants/ ps |
|------|------------|--------------------|
| 77K  | DAS 1      | 1.3                |
|      | DAS 2      | 2.0                |
|      | DAS 3      | 24.6               |
| 295K | DAS 1      | 1.1                |
|      | DAS 2      | 1.7                |
|      | DAS 3      | 12.7               |

### S3. Coherent Vibrations

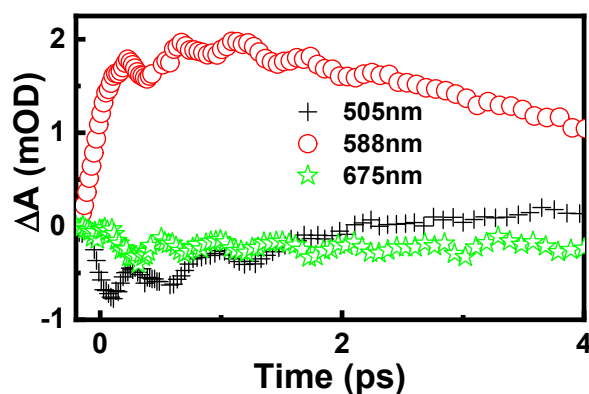

**Fig. S4** The extracted kinetic traces of  $\text{Au}_{144}\text{PET}_{60}$  at 505 nm, 588 nm and 675 nm which are monitored at 77K in film phase.

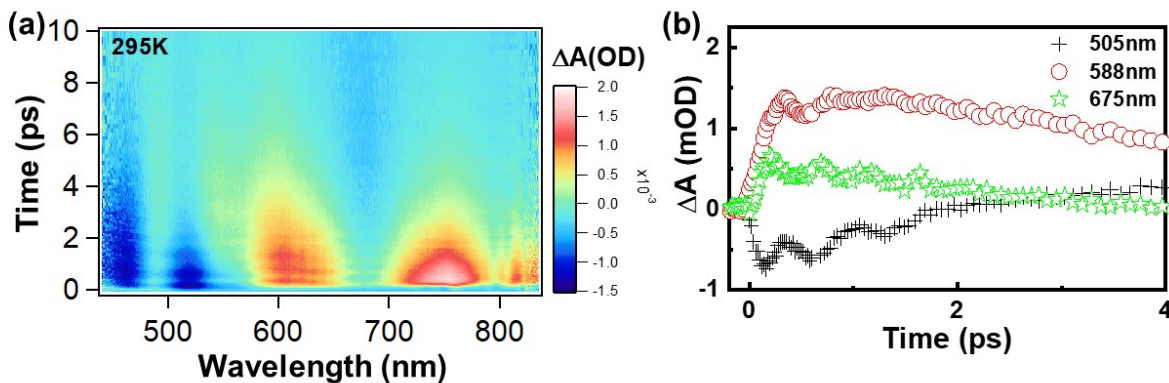

**Fig. S5** (a) The pseudo-color TA map of  $\text{Au}_{144}\text{PET}_{60}$  dispersed in PMMA thin film obtained at 295 K. (b) The extracted kinetic traces of  $\text{Au}_{144}\text{PET}_{60}$  at 505 nm, 588 nm and 675 nm which are monitored at 295K in film phase.

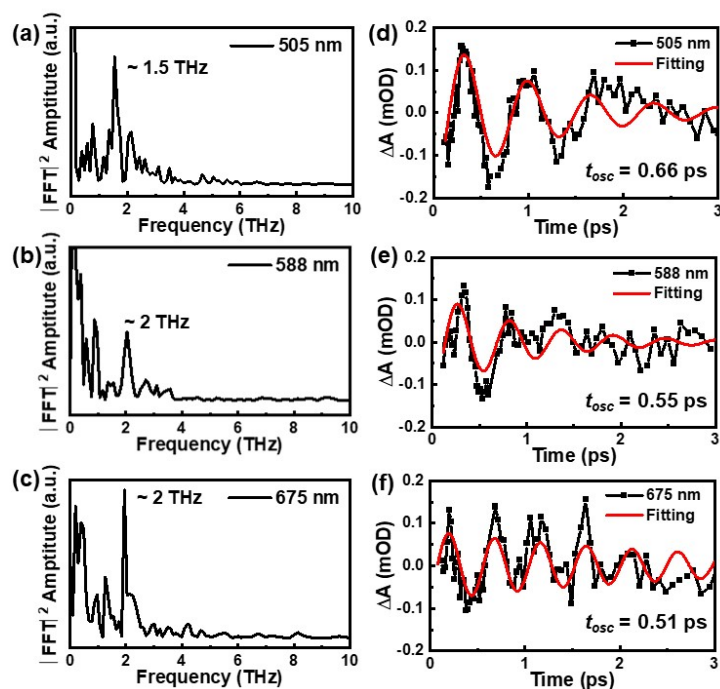

**Fig. S6** The FFT results (a, b, c) and analysis of oscillatory components (d, e, f) on the coherent vibrational dynamics of  $\text{Au}_{144}\text{PET}_{60}$  (295 K) probed at 505 nm, 588 nm, 675 nm.

#### S4. The TA profile of $\text{Au}_{144}$ and $\text{Au}_{25}$

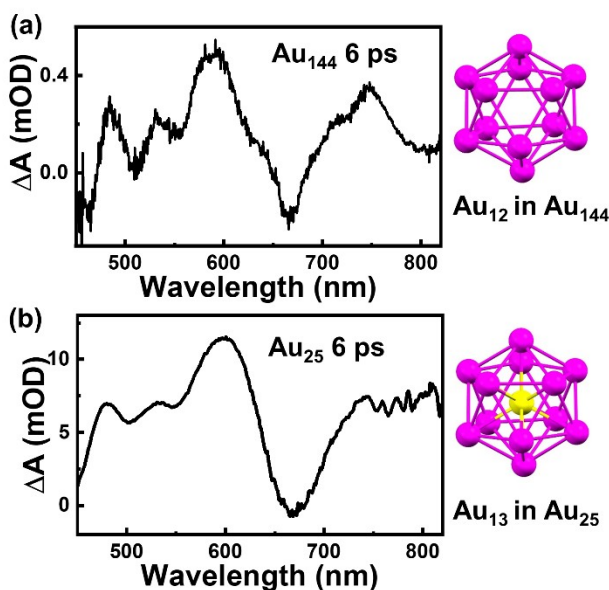

**Fig. S7** The TA spectra of (a)  $\text{Au}_{144}\text{PET}_{60}$  and (b)  $[\text{Au}_{25}\text{PET}_{18}]^-$  probed at time delay of 6 ps, the data in (b) was reproduced from ref. 3. The structures of icosahedral  $\text{Au}_{12}$  core in  $\text{Au}_{144}$  and  $\text{Au}_{13}$  core in  $\text{Au}_{25}$  are shown for comparison.

#### S5. References

1. H. Qian and R. Jin, *Chem. Mater.*, 2011, **23**, 2209-2217.
2. M. Zhou, J. S. Sarmiento, C. Fei and H. Wang, *J. Phys. Chem. C*, 2019, **123**, 22095-22103.
3. M. Zhou, C. Yao, M. Y. Sfeir, T. Higaki, Z. Wu and R. Jin, *J. Phys. Chem. C*, 2018, **122**, 13435-13442.
